# Supplementary figures and images for: Green extraction of cellulose fibers from pineapple crown waste for the development of pH-sensitive bioplastic films based on starch and purple cabbage anthocyanins
Source: Royal Society of Chemistry journal article supplement (doi:10.1039/d5su00648a), 2025-12-09

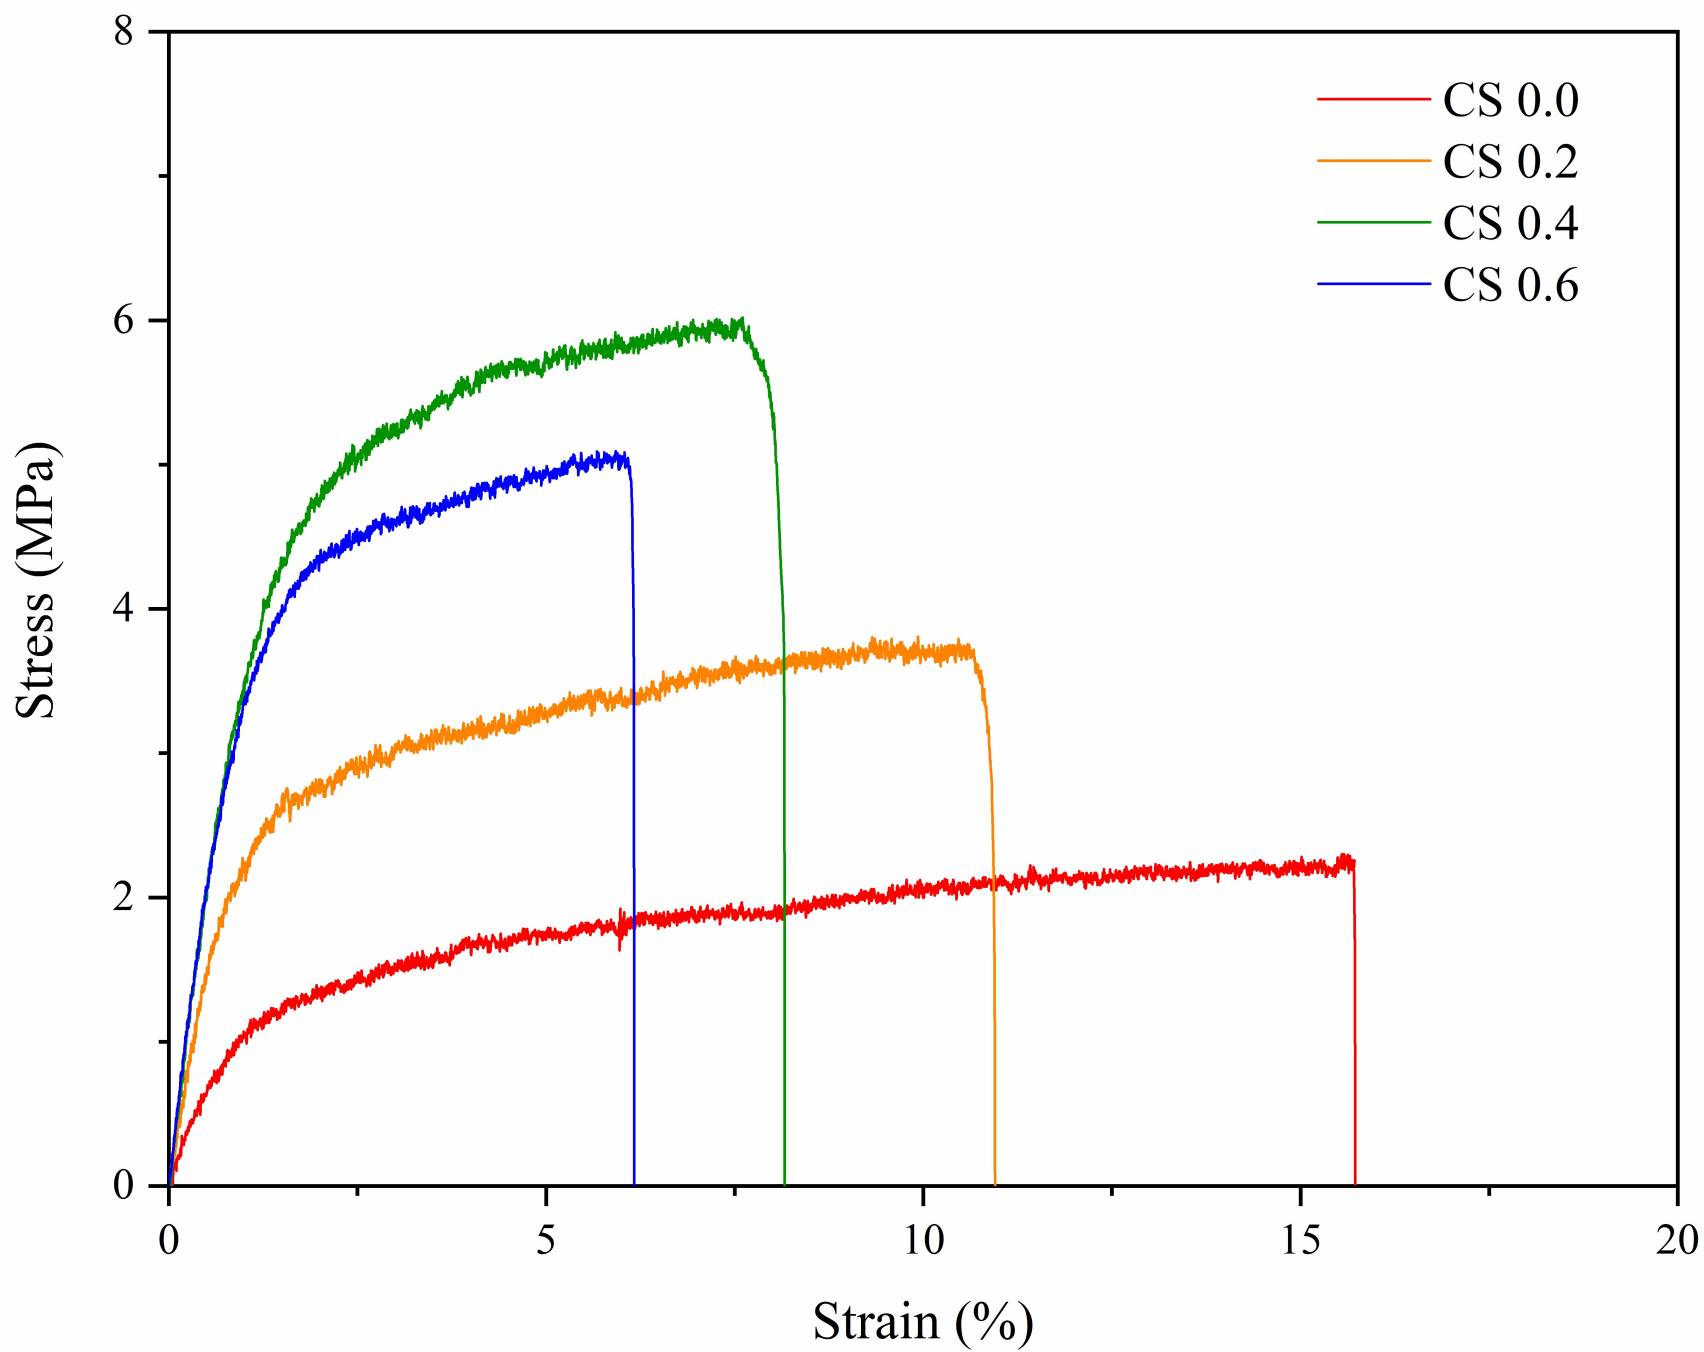

Supplement: d5su00648a2.pdf [file d5su00648a2.pdf]

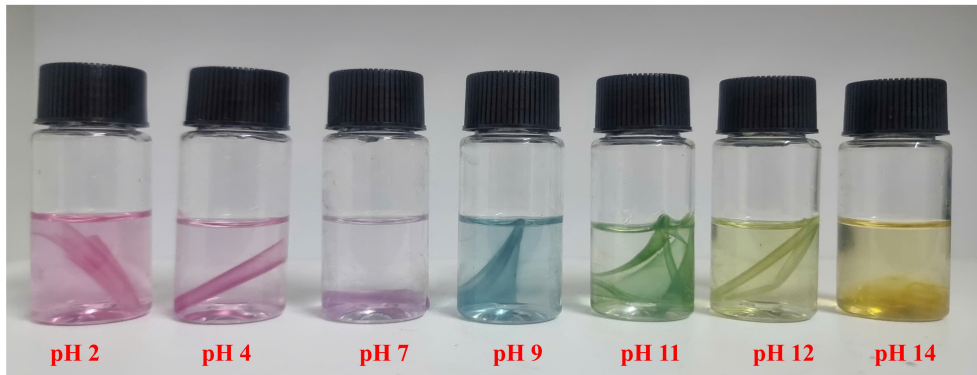

Supplement: d5su00648a3.pdf [file d5su00648a3.pdf]
